# Supplementary material for: Identifying individuals at risk of cognitive decline: Cross-sectional analysis of variability in neuropsychological test scores among community-dwelling older adults
Source: Research Square preprint supplement (doi:10.21203/rs.3.rs-8143343/v1), 2026-01-29
Supplement: Supplementary file 1 [file a7d6c0a666509234c2164b9e.docx]

**Appendix 1. Pearson’s correlation analysis between test scores**

|  | **MoCA** | **SPMSQ** | **MIS** | **SVF** |
| --- | --- | --- | --- | --- |
| **MoCA** | 1 | -.419** | .328** | .404** |
| **SPMSQ** | -.419** | 1 | -.380** | -.373** |
| **MIS** | .328** | -.380** | 1 | .247** |
| **SVF** | .404** | -.373** | .247** | 1 |

***: correlation is significant at p<0.01 level (two-tailed)*
